# Supplementary material
Source: PubMed Central journal article supplement (PMC4018877)
Supplement: CVI.00038-14_zcd999094971so1.pdf [file CVI.00038-14_zcd999094971so1.pdf]

## SUPPLEMENTAL MATERIALS

### 2 MATERIALS AND METHODS

#### 4 Expression and purification of binary toxin in *E. coli*.

The nucleotide sequence of CDTa (without N-terminal 43 residue signal peptide) was  
6 codon optimized by Genscript (Piscataway, NJ) with flanking *NdeI* and *XhoI* restriction  
sites and cloned into the *E. coli* expression vector pET-30a (EMD Millipore, Billerica,  
8 MA). The expression vector was transformed into the *E. coli* BLR (DE3) host  
(Invitrogen, Carlsbad, CA). In order to decrease protein dimerization, the cysteine at  
10 position 2 was mutated to alanine using Stratagene's QuikChangeII Site-Directed  
Mutagenesis Kit. After sequence verification, the mutated plasmid, pET-30a-1m\_cdtA,  
12 was transformed into *E. coli*. The recombinant proteins had a six-His tag at the C-  
terminus.

14

Expression and purification of His-tagged recombinant protein were performed according  
16 to EMD Millipore's pET System Manual. Briefly, expression was induced with the  
addition of IPTG to a final concentration of 1mM, and incubation continued at 37°C for 3  
18 hours. Bacteria were harvested by centrifugation, lysed by microfluidization at 980 bar  
(Microfluidics, Newton, MA) and clarified by centrifugation. Clarified lysates were  
20 loaded on a POROS 20 MC column (2.6 × 3.8 cm, Applied Biosystems, Foster City, CA)  
pre-loaded with Ni<sup>2+</sup>, and step elution was achieved in elution buffer containing 300 mM  
22 imidazole. CDTa and 1mCDTa products were further purified using POROS 50 HS (1.6  
× 14 cm, Applied Biosystems) cation exchange chromatography. CDTa and 1mCDTa

24 products were purified to greater than 98% purity and concentrated and buffer-exchanged  
into 50 mM HEPES buffer (pH 7.5, 150 mM NaCl) by tangential flow filtration (TFF)  
26 with a 5 kDa molecular weight cutoff (MWCO) Pellicon XL Biomax10 membrane (EMD  
Millipore) and stored at -70°C prior to use.

28

**Expression and purification of ProCDTb and CDTb in *E. coli*.** The nucleotide  
30 sequence of ProCDTb (without N-terminal 42 residue signal peptide) and CDTb (without  
N-terminal signal peptide and Pro domain) were codon optimized by Genscript with  
32 flanking *Bam*HI and *Xho*I sites and ligated into the expression vector pGEX-6p1 (GE  
Healthcare, Cleveland, OH). pGEX-6p1-*pro\_cdtB* and pGEX-6p1-*cdtB* were transformed  
34 into *E. coli* BLR (DE3). The recombinant proteins had a GST tag at the N-terminus and  
were named GST\_ProCDTb and GST\_CDTb respectively. Pro refers to the Pro-domain  
36 protein sequence between amino acid 1 and amino acid 168, which is cleaved off during  
chymotrypsin activation.

38

Expression and purification of GST-tagged recombinant proteins were performed  
40 according to the GE Healthcare's instruction manual and Sundriyal et al.'s paper (1).  
Briefly, expression was induced with the addition of IPTG to a final concentration of  
42 0.1mM, and incubation continued at 37°C for 5 hours. Bacteria were harvested by  
centrifugation and lysed by microfluidization at 980 bar. Clarified lysates were loaded on  
44 a glutathione Sepharose 4B column (5×5 cm, GE Healthcare). Step elution was achieved  
in GST elution buffer containing 20 mM reduced glutathione. GST-tagged products were  
46 polished to ~95% purity and aggregates were removed by size exclusion chromatography

(SEC) with a Superdex200 column (2.6 × 60 cm, GE Healthcare). GST\_ProCDTb was  
48 buffer-exchanged into 50 mM HEPES buffer (pH 6.5, 150 mM NaCl) by TFF with a  
10kDa MWCO membrane and the final product was stored at -70°C. GST\_CDTb  
50 underwent GST tag cleavage through treatment with the PreScission Protease (GE  
Healthcare) according to the GE Healthcare's instruction manual. CDTb was buffer-  
52 exchanged to 50 mM HEPES buffer (pH 6.5, 150 mM NaCl) by TFF with a 10 kDa  
MWCO membrane and stored at -70°C prior to use.

54

**Expression of toxins using a Bac-to-Bac<sup>®</sup> Baculovirus Expression System**  
56 **(Invitrogen, Carlsbad, CA).** Nucleotide sequence of 3mCDTa and ProCDTb were  
cloned into a pFastBac<sup>™</sup>1 transfer vector and the recombinant vector was transfected into  
58 Sf9 (ATCC, Manassas, VA), Sf21 (Kemp Biotechnology, Frederick, MD), or  
expresSF+<sup>®</sup> (Protein Sciences Corporation, Meriden, CT) cells using Cellfectin<sup>®</sup> II  
60 reagent to generate recombinant baculovirus. Insect cells were grown in suspension  
culture in Sf900-III culture medium. Virus amplification was performed by infection of  
62 Sf21 cells at a multiplicity of infection (MOI) of 0.1 to 1. The virus stocks were titered  
using a flow cytometric baculovirus titration assay (Expression Systems, Woodland, CA).

64

For recombinant protein generation, insect cells were grown in a 20-L Wave<sup>®</sup>  
66 bioreactor. The cultures were grown to a cell concentration of 1-2 × 10<sup>6</sup> cells/mL and  
infected at an MOI of 0.1-1.0. Cells were harvested after about 4-5 days of infection. The  
68 insect cells were lysed using a non-ionic detergent and clarified by centrifugation. All  
toxins were purified using a combination of chromatographic techniques yielding

70 products that were greater than 95% purity by SDS\_PAGE analysis (2). The purified  
antigens were concentrated and buffer-exchanged exchanged to 50 mM HEPES buffer  
72 (pH 7.5, 150 mM NaCl) using TFF and stored at -70°C.

74 **SDS-PAGE and anti-CDTa and anti-CDTb western blot.** Two micrograms of purified  
protein was mixed with an equal volume of 2x loading buffer and resolved in a 4%-20%  
76 gradient Tris-glycine gel (Invitrogen) according to the Laemmli method (3).  
Dithiothreitol was added to a final concentration of 50 mM for the reducing SDS-PAGE.  
78 Western blotting was performed using an iBlot gel transfer device (Invitrogen) according  
to the manufacturer's protocol. CDTa was detected using an anti-CDTa monoclonal  
80 antibody (mAb) and CDTb was detected using anti-CDTb mAb (mAbs generated at  
Merck Research Laboratories). HRP-goat-anti-mouse secondary antibody (Invitrogen)  
82 diluted to 1-to-2000 was used as the secondary antibody and the signal was developed  
using the HRP-substrate kit according to the manufacturer's protocol (Bio-Rad, Hercules,  
84 CA).

86 **Cell Lysate Preparation and anti-LSR western blot.** Cell lysate preparation and anti-  
LSR western blot were conducted similarly to methods described in the literature (4).  
88 Briefly, cells were washed twice with PBS and lysed on ice using Cell Extraction Buffer  
(Invitrogen) supplemented with 1mM PMSF and a protease inhibitor cocktail (Sigma, St.  
90 Louis, MO). Equal amounts of each cell lysate were separated by SDS-PAGE and  
transferred to nitrocellulose membranes for western blotting using the iBlot gel transfer  
92 device. LSR was detected using polyclonal rabbit anti-LSR antibody (Santa Cruz

Biotechnology, Dallas, TX). Actin was detected using anti-actin monoclonal antibody  
94 clone ACTN05 (Thermo Fisher Scientific, Waltham, MA).

96 **Electrospray Ionization Time-of-flight (ESI-TOF) Mass Spectrometry.** Liquid  
98 chromatography and MS analysis of chymotrypsin activated GST\_ProCDTb was performed  
with a capillary 1100 series HPLC system (Agilent Technologies, Santa Clara, CA) coupled  
100 to a MSD-ESI-TOF VL mass spectrometer (Agilent Technologies). The samples were diluted  
into 0.1% formic acid (Thermo Fisher Scientific) and injected on to a 0.5 mm x 50 mm  
102 Monolithic PS-DVB column (Thermo Fisher Scientific) at 75°C and eluted with a gradient of  
0.1% formic acid in water to 100% acetonitrile (Thermo Fisher Scientific) at a flow rate of  
104 0.015 mL/min. The eluent was injected into the mass spectrometer. Mass reconstruction from  
the raw data was accomplished using the BioConfirm software (Agilent Technologies). The  
106 accurate mass of the cleaved protein (observed by TOF-MS) was compared to the protein's  
primary sequence using Protein/Peptide Molecular Weight Calculation Tools (Agilent  
108 Technologies) to determine the amino acid sequence of the protein.

110 **Cell lines and cell culture.** Vero (African green monkey kidney, ATCC#CCL-81),  
IMR90 (human lung fibroblast, ATCC#CCL-186), T84 (human colorectal carcinoma  
112 epithelial, ATCC CCL-248), HT29 (colorectal adenocarcinoma, ATCC#HTB-38),  
HepG2 (human liver carcinoma, ATCC#HB-8065), and Caco-2 (human colon epithelial,  
114 ATCC#HTB-37) cell lines were obtained from the American Type Culture Collection  
(ATCC, Manassas, VA) and cultured as described by ATCC. Briefly, Vero and HepG2  
116 cells were cultured in Eagle's minimum essential medium (EMEM) supplemented with

10% heat-inactivated fetal bovine sera (FBS, HyClone, Logan, UT) and 100 units/mL of  
118 penicillin-streptomycin (Invitrogen). IMR90 cells were cultured in EMEM supplemented  
with 10% FBS and 100 units/mL of penicillin-streptomycin, 2 mM L-glutamine, 1%  
120 MEM non-essential amino acid (100× stock solution), 1 mM sodium pyruvate, and 1%  
sodium bicarbonate (7.5%). T84 cells were cultured in a 1:1 mixture of Hank's F12  
122 medium and Dulbecco's modified Eagles's medium supplemented with 5% FBS. HT29  
cells were cultured in McCoy's 5a Medium supplemented with 10% FBS and 100  
124 units/mL of penicillin-streptomycin. Caco-2 cells were cultured in EMEM supplemented  
with 20% heat-inactivated fetal bovine sera and 100 units/mL of penicillin-streptomycin.  
126 All cell culture media were purchased from ATCC. All cells were incubated in a  
humidified chamber at 37°C with 5% CO<sub>2</sub>.

128

## RESULTS

130

**Cell-line screening in the cytotoxicity assay.** HT29, T84, Caco-2, HepG2, and IMR-90  
132 cells were compared to Vero cells to determine whether these cell lines were sensitive to  
binary toxin utilizing the cytotoxicity assay conditions identified above. The geometric  
134 mean TC<sub>50</sub>s of 1mCDTa in binary toxin were 62 pM, 13 pM, 13 pM, 15 pM, and 29 pM  
for Vero, HT29, T84, Caco-2, and HepG2, respectively (FIG S1A). IMR-90 cells were  
136 found to be completely insensitive to binary toxin. The sensitivity of cell lines to binary  
toxin was consistent with the amount of LSR receptor expressed in each cell line (FIG  
138 S1B). T84, Caco-2, and HepG2 cell lines were not selected for the high throughput assay  
because they grew much slower than Vero cells under culture conditions described in the

140 method. HT-29 cells grew only slightly slower than Vero cells and were good cell  
substrates in the high throughput assay; however, we observed that incubation of HT29  
142 cells with a\_CDTb alone resulted in cell cytotoxicity at concentrations greater than 750  
pM through a mechanism that was independent of F-actin depolymerization. Therefore,  
144 we did not select HT-29 cells for the binary toxin NAb assay.

146

## REFERENCES

- 148 **1. Sundriyal A, Roberts AK, Ling R, McGlashan J, Shone CC, Acharya KR.**  
2010. Expression, purification and cell cytotoxicity of actin-modifying binary  
150 toxin from *Clostridium difficile*. *Protein Expr Purif* **74**:42-48.
- 2. Heinrichs JH, Bodmer JL, Secore SL, Goerke AR, Caro-Aguilar I, Gentile**  
152 **MP, Horton MS, Mizejewski MR, Skinner JM, Sondermeijer PJA,**  
**Subramanian S, Heijden-Liefkens KH, Wang S, Xie J, Xoconostle RF,**  
154 **Zorman JK. Aug 2013.** Vaccines against *Clostridium difficile* comprising  
recombinant toxins. Patent WO2013112867.
- 156 **3. Laemmli UK. 1970.** Cleavage of structural proteins during the assembly of the  
head of bacteriophage T4. *Nature* **227**:680-685.
- 158 **4. Papatheodorou P, Hornuss D, Nolke T, Hemmasi S, Castonguay J, Picchianti**  
**M, Aktories K. 2013.** *Clostridium difficile* binary toxin CDT induces clustering  
160 of the lipolysis-stimulated lipoprotein receptor into lipid rafts. *mBio* **4**:e00244-  
00213.

162

164

**TABLE S1.** Experimental design of binary toxin NAb assay DOE

| Analyst | Day | Block   | Cell Density<br>(cells/well) | Toxin Conc.<br>(pM) | Pre-Incubation<br>Time (minutes) |
|---------|-----|---------|------------------------------|---------------------|----------------------------------|
| 1       | 1   | Block 1 | 1000                         | 968                 | 30                               |
| 1       | 1   | Block 1 | 1000                         | 242                 | 120                              |
| 1       | 1   | Block 1 | 1500                         | 484                 | 60                               |
| 1       | 1   | Block 1 | 2000                         | 242                 | 30                               |
| 1       | 1   | Block 1 | 2000                         | 968                 | 120                              |
| 1       | 1   | Block 1 | 1000                         | 242                 | 30                               |
| 2       | 1   | Block 2 | 1000                         | 968                 | 120                              |
| 2       | 1   | Block 2 | 1500                         | 484                 | 60                               |
| 2       | 1   | Block 2 | 2000                         | 968                 | 30                               |
| 2       | 1   | Block 2 | 2000                         | 242                 | 120                              |
| 2       | 1   | Block 2 | 1000                         | 484                 | 60                               |
| 2       | 1   | Block 2 | 1500                         | 484                 | 30                               |
| 1       | 2   | Block 3 | 1500                         | 484                 | 60                               |
| 1       | 2   | Block 3 | 2000                         | 484                 | 60                               |
| 1       | 2   | Block 3 | 1500                         | 242                 | 60                               |
| 1       | 2   | Block 3 | 1500                         | 484                 | 60                               |
| 2       | 2   | Block 4 | 1500                         | 968                 | 60                               |
| 2       | 2   | Block 4 | 1500                         | 484                 | 120                              |
| 2       | 2   | Block 4 | 1000                         | 968                 | 30                               |
| 2       | 2   | Block 4 | 1000                         | 242                 | 120                              |

166 Note: The 18 runs were divided between 2 analysts and 2 days of testing, with the four  
combinations of analyst and day defining the four blocks. The 18 runs consisted of the  
168 eight combinations of the three factors at their low and high settings, the six face-  
centered axial points, and the center condition tested once within each block (total of 4  
170 times).



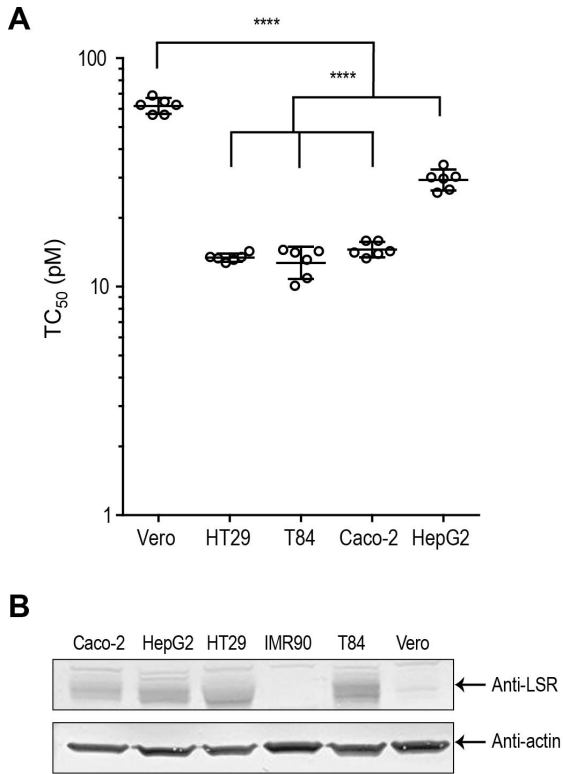

174

FIG S1 Cell-line screening in the binary toxin cytotoxicity assay. (A) TC<sub>50</sub> of 1mCDTa in  
 176 binary toxin with Vero, HT29, T84, Caco-2 and HepG2 cells substrates. 1mCDTa was  
 mixed with a\_CDTb at 1-to-7 molar ratio. Midpoint lines indicate the geometric mean  
 178 value. Error bars indicate the 95% confidence interval of the geometric mean (n=6).  
 Statistical comparisons were performed using the Bonferroni's Multiple Comparison  
 180 Test. \*\*\*, P≤0.001. (B) Anti-LSR western blot of cell lysates. There is no visible band in  
 the IMR-90 cell lysate and a weak band in the Vero cell lysate. However, the anti-LSR  
 182 bands were much darker in the HT29, T84, Caco-2, and HepG2 cell lysates. An anti-actin  
 monoclonal antibody was used to assess equal protein loading of the cell lysates.
